# Supplementary material for: Biomarkers of Exposure among Adult Smokeless Tobacco Users in the Population Assessment of Tobacco and Health Study (Wave 1, 2013–2014)
Source: Oxford University Press journal article supplement (doi:10.1158/1055-9965.epi-19-0766), 2020-01-27
Supplement: 10559965epi190766-sup-224843_2_supp_5945692_q25x2r.docx [file 10559965epi190766-sup-224843_2_supp_5945692_q25x2r.docx]

**Biomarkers of Exposure among Adult Smokeless Tobacco Users in the Population Assessment of Tobacco and Health Study (Wave 1)**

**Online Data Supplements**

Table S1. Urinary BOEs in PATH Study Wave 1

| **Panel** | **Reference** | **Analyte** | **Abbreviation** | **Limit of Detection (LOD)** | **Quality Material Precision CV (%)** | |
| --- | --- | --- | --- | --- | --- | --- |
| **Low concentration** | **High concentration** |
| Nicotine metabolites | Wei et al., 2014; Bernert et al. 2005(1,2) | cotinine | COTT | 0.03 ng/mL | 3.52 | 3.08 |
| trans-3'-hydroxycotinine | HCTT | 0.03 ng/mL | 3.82 | 3.49 |
| anabasine | ANBT | 0.51 ng/mL | 6.26 | 4.93 |
| anatabine | ANTT | 0.39 ng/mL | 3.48 | 4.13 |
| cotinine N-oxide | COXT | 2.02 ng/mL | 5.82 | 4.04 |
| norcotinine | NCTT | 1.11 ng/mL | 3.64 | 3.63 |
| nicotine | NICT | 10.50 ng/mL | 7.42 | 3.35 |
| nornicotine | NNCT | 2.50 ng/mL | 5.79 | 5.66 |
| nicotine 1'-Oxide | NOXT | 2.50 ng/mL | 4.58 | 4.42 |
| Total Nicotine Equivalent-2 | TNE-2 | N/A (calculated as molar sum of COTT and HCTT) | N/A | N/A |
| Tobacco Specific Nitrosamines (TSNAs) | Xia et al. 2014(3) | 4-(methylnitrosamino)-1-(3-pyridyl)-1-butanonol | NNAL | 0.0006 ng/mL | 2.86 | 2.82 |
| N'-nitrosoanabasine | NAB | 0.0016 ng/mL | 2.64 | 2.59 |
| N'-nitrosoanatabine | NAT | 0.0042 ng/mL | 5.02 | 3.84 |
| N'-nitrosonornicotine | NNN | 0.0028 ng/mL | 2.40 | 2.22 |
| Polycyclic Aromatic Hydocarbons (PAHs) | Wang et al., 2017(4) | 1-hydroxypyrene | 1-PYR | 70 ng/L | 12.57 | 9.02 |
| 3-hydroxyfluorene | 3-FLU | 8 ng/L | 5.96 | 5.77 |
| 2-hydroxyfluorene | 2-FLU | 8 ng/L | 5.34 | 5.64 |
| 1-hydroxynapthalene | 1-NAP | 60 ng/L | 7.32 | 5.03 |
| 2-hydroxynapthalene | 2-NAP | 90 ng/L | 5.67 | 5.23 |
| 1-hydroxyphenanthrene | 1-PHE | 9 ng/L | 7.86 | 6.66 |
| 2-hydroxyphenanthrene and 3-hydroxyphenanthrene | 2,3-PHE | 10 ng/L | 5.36 | 5.24 |
| Volatile Organic Compounds (VOCs) | Alwis et al. 2012; Alwis et al. 2016(5,6) | 2-Methylhippuric acid | 2MHA | 5.0 ng/mL | 9.13 | 7.27 |
| 3-Methylhippuric acid+4-Methylhippuric acid | 34MH | 8.0 ng/mL | 6.54 | 6.68 |
| N-Acetyl-S-(2-carbamoylethyl)-L-cysteine | AAMA | 2.2 ng/mL | 9.06 | 8.98 |
| N-Acetayl-S-(N-methylcarbamoyl)-L-cysteine | AMCA | 6.26 ng/mL | 10.65 | 6.88 |
| N-Acetyl-S-(benzyl)-L-cysteine | BMA | 0.5 ng/mL | 10.37 | 9.80 |
| N-Acetyl-S-(2-carboxyethyl)-L-cysteine | CEMA | 6.96 ng/mL | 7.46 | 6.25 |
| N-Acetyl-S-(1-cyano-2-hydroxyethyl)-L-cysteine | CYHA | 2.6 ng/mL | 8.98 | 4.93 |
| N-Acetyl-S-(2-cyanoethyl)-L-cysteine | CYMA | 0.5 ng/mL | 8.62 | 6.09 |
| N-Acetyl-S-(3,4-dihydroxybutyl)-L-cysteine | DHBM | 5.25 ng/mL | 6.37 | 8.26 |
| N-Acetyl-S-(2-carbamoyl-2-hydroxyethyl)-L-cysteine | GAMA | 9.4 ng/mL | 7.26 | 4.75 |
| N-Acetyl-S-(2-hydroxyethyl)-L-cysteine | HEMA | 0.791 ng/mL | 10.07 | 6.16 |
| N-Acetyl-S-(2-hydroxypropyl)-L-cysteine | HPM2 | 5.3 ng/mL | 7.60 | 7.21 |
| N-Acetyl-S-(3-hydroxypropyl)-L-cysteine | HPMA | 13 ng/mL | 8.28 | 9.64 |
| N-Acetyl-S-(3-hydroxypropyl-1-methyl)-L-cysteine | HPMM | 3.0 ng/mL | 7.35 | 5.49 |
| N-Acetyl-S-(4-hydroxy-2-methyl-2-buten-1-yl)-L-cysteine | IPM3 | 0.74 ng/mL | 9.45 | 5.91 |
| Mandelic acid | MADA | 12.0 ng/mL | 10.18 | 6.36 |
| N-Acetyl-S-(4-hydroxy-2-buten-1-yl)-L-cysteine | MHB3 | 0.6 ng/mL | 12.96 | 6.51 |
| Phenylglyoxylic acid | PHGA | 12.0 ng/mL | 12.21 | 12.93 |
| N-Acetyl-S-(phenyl)-L-cysteine | PMA | 0.6 ng/mL | 9.48 | 9.01 |
| 2-Thioxothiazolidine-4-carboxylic acid | TTCA | 11.2 ng/mL | 13.02 | 8.49 |
| Metals | Caldwell et al., 2005; Jarrett et al., 2008(7,8) | Cadmium | UCD | 0.036 µg/L | 10.28 | 4.89 |
| Lead | UPB | 0.03 µg/L | 5.36 | 1.39 |
| Beryllium | UBE | 0.016 µg/L | 3.76 | 2.49 |
| Cobalt | UCO | 0.023 µg/L | 14.46 | 3.96 |
| Manganese | UMN | 0.13 µg/L | 7.18 | 8.20 |
| Strontium | USR | 2.34 µg/L | 2.80 | 3.22 |
| Thallium | UTL | 0.018 µg/L | 5.12 | 2.78 |
| Uranium | UUR | 0.002 µg/L | 6.14 | 2.81 |
| Inorganic Arsenic Species | Caldwell et al., 2009; Verdon et al., 2009(9,10) | Arsenite | UAS3 | 0.12 µg/L | 5.07 | 5.11 |
| Arsenate | UAS5 | 0.79 µg/L | 4.14 | 3.37 |
| Dimethylarsinic acid | UDMA | 1.91 µg/L | 6.14 | 4.00 |
| Monomethylarsonic acid | UMMA | 0.20 µg/L | 4.19 | 5.11 |
| total inorganic arsenic |  | N/A (calculated as sum of the arsenous acid, arsenic acid, dimethylarsinic acid, and monomethylarsonic acid | N/A | N/A |

Table S2. Urinary BOEs of Nicotine Metabolites in PATH Study Wave 1

|  |  | **Exclusive Current Est. Cig Users DAILY** | | | | | **Exclusive Current Est. Cig Users NONDAILY** | | | | | **Exclusive Current Est. SLT Users DAILY** | | | | |
| --- | --- | --- | --- | --- | --- | --- | --- | --- | --- | --- | --- | --- | --- | --- | --- | --- |
| Analyte* | Unit | N | Geometric Mean | Lower Bound of 95% CI | Upper Bound of 95% CI | flag | N | Geometric Mean | Lower Bound of 95% CI | Upper Bound of 95% CI | flag | N | Geometric Mean | Lower Bound of 95% CI | Upper Bound of 95% CI | flag |
| TNE2 | umol/g creatinine | 1988 | 46.27 | 43.20 | 49.55 |  | 434 | 2.13 | 1.32 | 3.45 | † | 351 | 68.64 | 60.23 | 78.23 |  |
| COTT | ug/g creatinine | 1989 | 3013.03 | 2813.78 | 3226.39 |  | 437 | 136.55 | 86.14 | 216.45 |  | 351 | 4321.26 | 3774.42 | 4947.34 |  |
| HCTT | ug/g creatinine | 1988 | 5138.26 | 4733.14 | 5578.06 |  | 434 | 229.98 | 139.89 | 378.10 |  | 351 | 7911.31 | 6927.40 | 9034.96 |  |
| ANBT | ug/g creatinine | 1974 | 9.70 | 9.04 | 10.41 |  | 343 | 1.55 | 1.13 | 2.12 | † | 345 | 18.06 | 15.78 | 20.66 |  |
| ANTT | ug/g creatinine | 1972 | 16.77 | 15.45 | 18.20 |  | 342 | 2.06 | 1.46 | 2.91 |  | 345 | 37.88 | 32.67 | 43.92 |  |
| COXT | ug/g creatinine | 1974 | 365.62 | 344.90 | 387.58 |  | 343 | 62.88 | 47.69 | 82.90 |  | 345 | 517.31 | 465.24 | 575.20 |  |
| NCTT | ug/g creatinine | 1974 | 111.19 | 105.96 | 116.67 |  | 343 | 18.36 | 13.22 | 25.48 |  | 345 | 135.30 | 121.08 | 151.19 |  |
| NICT | ug/g creatinine | 1972 | 1446.22 | 1318.43 | 1586.40 |  | 343 | 138.44 | 99.79 | 192.07 |  | 345 | 1929.62 | 1682.91 | 2212.51 |  |
| NNCT | ug/g creatinine | 1967 | 75.70 | 71.23 | 80.46 |  | 342 | 11.35 | 8.39 | 15.36 |  | 344 | 99.90 | 88.40 | 112.91 |  |
| NOXT | ug/g creatinine | 1974 | 431.41 | 402.95 | 461.87 |  | 343 | 46.88 | 33.34 | 65.91 |  | 345 | 661.29 | 585.22 | 747.23 |  |
|  |  | **Exclusive Current Est. SLT Users NONDAILY** | | | | | **DAILY CIG+DAILY SLT** | | | | | **DAILY CIG+NONDAILY SLT** | | | | |
| Analyte* | Unit | N | Geometric Mean | Lower Bound of 95% CI | Upper Bound of 95% CI | flag | N | Geometric Mean | Lower Bound of 95% CI | Upper Bound of 95% CI | flag | N | Geometric Mean | Lower Bound of 95% CI | Upper Bound of 95% CI | flag |
| TNE2 | umol/g creatinine | 97 | 5.36 | 2.60 | 11.06 |  | 33 | 60.71 | 33.71 | 109.35 | † | 56 | 47.80 | 41.26 | 55.38 |  |
| COTT | ug/g creatinine | 97 | 341.45 | 169.52 | 687.73 |  | 33 | 4357.67 | 2157.61 | 8801.09 | † | 56 | 3521.00 | 3028.83 | 4093.16 |  |
| HCTT | ug/g creatinine | 97 | 605.81 | 285.18 | 1286.96 |  | 33 | 6514.03 | 3795.45 | 11179.85 | † | 56 | 5005.50 | 4090.20 | 6125.62 |  |
| ANBT | ug/g creatinine | 80 | 3.93 | 2.36 | 6.55 |  | 32 | 17.90 | 10.72 | 29.87 | † | 56 | 9.59 | 8.19 | 11.23 |  |
| ANTT | ug/g creatinine | 80 | 6.52 | 3.43 | 12.39 |  | 32 | 31.78 | 16.51 | 61.16 | † | 56 | 16.94 | 14.30 | 20.07 |  |
| COXT | ug/g creatinine | 80 | 104.13 | 63.54 | 170.66 |  | 32 | 543.57 | 408.48 | 723.33 | † | 56 | 367.29 | 321.12 | 420.10 |  |
| NCTT | ug/g creatinine | 80 | 31.04 | 18.46 | 52.18 |  | 32 | 159.79 | 123.00 | 207.58 | † | 56 | 104.66 | 90.69 | 120.77 |  |
| NICT | ug/g creatinine | 80 | 267.44 | 139.27 | 513.59 |  | 32 | 2138.74 | 1091.44 | 4190.98 | † | 56 | 1460.22 | 1162.88 | 1833.58 |  |
| NNCT | ug/g creatinine | 80 | 22.13 | 12.99 | 37.68 |  | 32 | 111.58 | 69.37 | 179.47 | † | 56 | 74.24 | 64.20 | 85.85 |  |
| NOXT | ug/g creatinine | 80 | 87.29 | 43.05 | 176.98 |  | 32 | 645.46 | 386.85 | 1076.96 | † | 56 | 410.68 | 347.91 | 484.79 |  |
|  |  | **NONDAILY CIG+DAILY SLT** | | | | | **NONDAILY CIG+ NONDAILY SLT** | | | | | **Never Tobacco Users** | | | | |
| Analyte* | Unit | N | Geometric Mean | Lower Bound of 95% CI | Upper Bound of 95% CI | flag | N | Geometric Mean | Lower Bound of 95% CI | Upper Bound of 95% CI | flag | N | Geometric Mean | Lower Bound of 95% CI | Upper Bound of 95% CI | flag |
| TNE2 | umol/g creatinine | 35 | 53.58 | 39.89 | 71.97 | † | 16 | 9.35 | 3.89 | 22.46 | † | 1633 | 0.01 | 0.01 | 0.01 |  |
| COTT | ug/g creatinine | 35 | 3491.60 | 2605.57 | 4678.93 | † | 16 | 645.91 | 278.14 | 1499.94 | † | 1644 | 0.42 | 0.36 | 0.48 |  |
| HCTT | ug/g creatinine | 35 | 6229.91 | 4564.57 | 8502.84 | † | 16 | 1047.85 | 417.48 | 2630.04 | † | 1641 | 0.69 | 0.59 | 0.80 |  |
| ANBT | ug/g creatinine | 35 | 10.97 | 6.82 | 17.65 | † | 15 | 1.59 | 0.76 | 3.33 | † | 88 | 0.61 | 0.35 | 1.05 | †, ‡ (73.9%) |
| ANTT | ug/g creatinine | 35 | 20.00 | 11.27 | 35.51 | † | 15 | 2.57 | 1.04 | 6.35 | † | 88 | 0.62 | 0.31 | 1.23 | †, ‡ (61.4%) |
| COXT | ug/g creatinine | 35 | 411.99 | 303.65 | 558.98 | † | 15 | 98.63 | 55.32 | 175.87 | † | 88 | 13.86 | 6.86 | 28.03 |  |
| NCTT | ug/g creatinine | 35 | 89.18 | 65.42 | 121.57 | † | 15 | 23.40 | 13.33 | 41.05 | † | 88 | 4.27 | 2.27 | 8.02 |  |
| NICT | ug/g creatinine | 35 | 1195.64 | 683.93 | 2090.22 | † | 15 | 195.30 | 62.07 | 614.55 | † | 88 | 31.30 | 12.32 | 79.51 |  |
| NNCT | ug/g creatinine | 35 | 59.69 | 40.33 | 88.33 | † | 15 | 12.35 | 5.99 | 25.45 | † | 88 | 3.39 | 1.85 | 6.22 | ‡ (63.6%) |
| NOXT | ug/g creatinine | 35 | 362.50 | 216.18 | 607.85 | † | 15 | 80.31 | 31.67 | 203.68 | † | 88 | 11.50 | 4.25 | 31.15 |  |

*For samples with cotinine levels above or equal to 20 ng/mL, anatabine, anabasine, and nicotine plus its six major metabolites (cotinine-N-oxide, nicotine-N-oxide, trans-3'-hydroxycotinine, norcotinine, cotinine and nornicotine) were measured. For samples with cotinine levels less than 20 ng/mL, cotinine (COTT) and trans-3’-hydroxycotinine (HCTT) were measured.

† Estimate should be interpreted with caution because it has low precision. It is based on a sample size of less than 50, or the coefficient of variation of the estimate is larger than 30 percent. (i.e. RSE > 30% or n <50)

‡ Estimates were flagged due to more than 40% of the samples below LOD in the tobacco user group. The percentage of samples below LOD are in quotes.

Table S3. Urinary BOEs of TSNAs in PATH Study Wave 1

|  |  | **Exclusive Current Est. Cig Users DAILY** | | | | | **Exclusive Current Est. Cig Users NONDAILY** | | | | | **Exclusive Current Est. SLT Users DAILY** | | | | |
| --- | --- | --- | --- | --- | --- | --- | --- | --- | --- | --- | --- | --- | --- | --- | --- | --- |
| Analyte | Unit | N | Geometric Mean | Lower Bound of 95% CI | Upper Bound of 95% CI | flag | N | Geometric Mean | Lower Bound of 95% CI | Upper Bound of 95% CI | flag | N | Geometric Mean | Lower Bound of 95% CI | Upper Bound of 95% CI | flag |
| NNAL | ng/g creatinine | 1988 | 298.30 | 276.26 | 322.10 |  | 436 | 27.09 | 21.66 | 33.88 |  | 351 | 996.71 | 852.08 | 1165.88 |  |
| NAB | ng/g creatinine | 1981 | 21.38 | 19.48 | 23.47 |  | 437 | 3.11 | 2.54 | 3.83 | ‡ (47.4%) | 351 | 41.97 | 35.71 | 49.32 |  |
| NAT | ng/g creatinine | 1965 | 141.04 | 128.51 | 154.78 |  | 434 | 12.75 | 9.81 | 16.57 | ‡ (42.1%) | 345 | 453.44 | 382.76 | 537.17 |  |
| NNN | ng/g creatinine | 1898 | 14.88 | 13.82 | 16.03 |  | 428 | 3.36 | 2.84 | 3.97 | ‡ (58.1%) | 335 | 33.90 | 29.61 | 38.81 |  |
|  |  | **Exclusive Current Est. SLT Users NONDAILY** | | | | | **DAILY CIG+DAILY SLT** | | | | | **DAILY CIG+NONDAILY SLT** | | | | |
| Analyte | Unit | N | Geometric Mean | Lower Bound of 95% CI | Upper Bound of 95% CI | flag | N | Geometric Mean | Lower Bound of 95% CI | Upper Bound of 95% CI | flag | N | Geometric Mean | Lower Bound of 95% CI | Upper Bound of 95% CI | flag |
| NNAL | ng/g creatinine | 97 | 117.49 | 69.77 | 197.85 |  | 33 | 863.09 | 634.58 | 1173.89 | † | 56 | 358.00 | 298.67 | 429.12 |  |
| NAB | ng/g creatinine | 97 | 6.32 | 4.22 | 9.48 |  | 33 | 52.53 | 24.95 | 110.61 | † | 55 | 31.75 | 26.20 | 38.49 |  |
| NAT | ng/g creatinine | 97 | 39.47 | 22.94 | 67.89 |  | 33 | 454.54 | 193.82 | 1066.00 | † | 56 | 209.48 | 167.09 | 262.63 |  |
| NNN | ng/g creatinine | 94 | 7.37 | 4.97 | 10.94 | ‡ (46.4%) | 33 | 33.56 | 18.28 | 61.63 | † | 55 | 16.94 | 13.67 | 20.99 |  |
|  |  | **NONDAILY CIG+DAILY SLT** | | | | | **NONDAILY CIG+ NONDAILY SLT** | | | | | **Never Tobacco Users** | | | | |
| Analyte | Unit | N | Geometric Mean | Lower Bound of 95% CI | Upper Bound of 95% CI | flag | N | Geometric Mean | Lower Bound of 95% CI | Upper Bound of 95% CI | flag | N | Geometric Mean | Lower Bound of 95% CI | Upper Bound of 95% CI | flag |
| NNAL | ng/g creatinine | 35 | 680.22 | 479.35 | 965.26 | † | 16 | 98.37 | 54.34 | 178.07 | † | 1653 | 0.92 | 0.82 | 1.04 | †, ‡ (45.5%) |
| NAB | ng/g creatinine | 35 | 30.63 | 20.13 | 46.61 | † | 15 | 7.65 | 4.72 | 12.41 | † | 1655 | 1.07 | 1.00 | 1.14 | †, ‡ (97.4%) |
| NAT | ng/g creatinine | 34 | 277.82 | 167.57 | 460.60 | † | 16 | 46.79 | 24.32 | 90.01 | † | 1648 | 2.92 | 2.74 | 3.11 | ‡ (97.5%) |
| NNN | ng/g creatinine | 34 | 18.11 | 11.58 | 28.31 | † | 16 | 4.43 | 2.41 | 8.14 | † | 1647 | 1.92 | 1.81 | 2.04 | ‡ (98.1%) |

† Estimate should be interpreted with caution because it has low precision. It is based on a sample size of less than 50, or the coefficient of variation of the estimate is larger than 30 percent (i.e. RSE > 30% or n <50)

‡ Estimates were flagged due to more than 40% of the samples below LOD in the tobacco user group. The percentage of samples below LOD are in quotes.

Table S4. Urinary BOEs of PAHs in PATH Study Wave 1

|  |  | **Exclusive Current Est. Cig Users Daily** | | | | | **Exclusive Current Est. Cig Users Nondaily** | | | | | **Exclusive Current Est. SLT Users Daily** | | | | |
| --- | --- | --- | --- | --- | --- | --- | --- | --- | --- | --- | --- | --- | --- | --- | --- | --- |
| Analyte | Unit | N | Geometric Mean | Lower Bound of 95% CI | Upper Bound of 95% CI | flag | N | Geometric Mean | Lower Bound of 95% CI | Upper Bound of 95% CI | flag | N | Geometric Mean | Lower Bound of 95% CI | Upper Bound of 95% CI | flag |
| 1-PYR | ng/g creatinine | 1990 | 333.93 | 316.86 | 351.93 |  | 437 | 173.43 | 155.51 | 193.42 |  | 351 | 173.08 | 158.29 | 189.24 |  |
| 3-FLU | ng/g creatinine | 1990 | 709.56 | 676.58 | 744.14 |  | 437 | 165.64 | 141.19 | 194.33 |  | 351 | 164.05 | 149.15 | 180.44 |  |
| 2-FLU | ng/g creatinine | 1990 | 1228.17 | 1172.20 | 1286.82 |  | 437 | 334.43 | 295.75 | 378.17 |  | 351 | 324.07 | 299.46 | 350.71 |  |
| 1-NAP | ug/g creatinine | 1990 | 14.38 | 13.20 | 15.67 |  | 437 | 2.63 | 2.16 | 3.18 |  | 351 | 1.36 | 1.22 | 1.52 |  |
| 2-NAP | ug/g creatinine | 1990 | 15.84 | 15.22 | 16.49 |  | 437 | 6.49 | 5.70 | 7.38 |  | 351 | 4.44 | 3.97 | 4.98 |  |
| 1-PHE | ng/g creatinine | 1990 | 192.11 | 183.72 | 200.87 |  | 437 | 113.82 | 100.21 | 129.28 |  | 351 | 141.69 | 128.11 | 156.71 |  |
| 2,3-PHE | ng/g creatinine | 1990 | 338.00 | 321.74 | 355.09 |  | 437 | 166.26 | 151.68 | 182.24 |  | 351 | 224.92 | 207.37 | 243.95 |  |
|  |  | **Exclusive Current Est. SLT Users Nondaily** | | | | | **Daily CIG+Daily SLT** | | | | | **Daily CIG+Nondaily SLT** | | | | |
| Analyte | Unit | N | Geometric Mean | Lower Bound of 95% CI | Upper Bound of 95% CI | flag | N | Geometric Mean | Lower Bound of 95% CI | Upper Bound of 95% CI | flag | N | Geometric Mean | Lower Bound of 95% CI | Upper Bound of 95% CI | flag |
| 1-PYR | ng/g creatinine | 97 | 151.81 | 125.28 | 183.96 |  | 33 | 289.28 | 229.70 | 364.32 | † | 56 | 343.58 | 239.32 | 493.26 |  |
| 3-FLU | ng/g creatinine | 96 | 99.71 | 79.40 | 125.21 |  | 33 | 463.76 | 327.81 | 656.11 | † | 56 | 656.44 | 519.67 | 829.20 |  |
| 2-FLU | ng/g creatinine | 97 | 213.81 | 176.72 | 258.69 |  | 33 | 872.83 | 635.01 | 1199.73 | † | 56 | 1194.03 | 940.72 | 1515.54 |  |
| 1-NAP | ug/g creatinine | 97 | 1.27 | 1.01 | 1.59 | † | 33 | 7.69 | 4.90 | 12.07 | † | 56 | 11.58 | 9.43 | 14.22 |  |
| 2-NAP | ug/g creatinine | 97 | 3.71 | 3.11 | 4.44 |  | 33 | 11.58 | 8.36 | 16.05 | † | 56 | 14.18 | 12.11 | 16.62 |  |
| 1-PHE | ng/g creatinine | 97 | 108.33 | 88.59 | 132.48 |  | 33 | 151.09 | 118.07 | 193.34 | † | 56 | 179.09 | 132.00 | 242.98 |  |
| 2,3-PHE | ng/g creatinine | 97 | 151.91 | 124.65 | 185.12 |  | 33 | 300.88 | 240.98 | 375.66 | † | 56 | 343.29 | 258.15 | 456.51 |  |
|  |  | **Nondaily CIG+Daily SLT** | | | | | **Nondaily CIG+ Nondaily SLT** | | | | | **Never Tobacco Users** | | | | |
| Analyte | Unit | N | Geometric Mean | Lower Bound of 95% CI | Upper Bound of 95% CI | flag | N | Geometric Mean | Lower Bound of 95% CI | Upper Bound of 95% CI | flag | N | Geometric Mean | Lower Bound of 95% CI | Upper Bound of 95% CI | flag |
| 1-PYR | ng/g creatinine | 35 | 181.67 | 145.84 | 226.31 | † | 16 | 173.55 | 119.70 | 251.63 | † | 1655 | 128.13 | 120.68 | 136.04 |  |
| 3-FLU | ng/g creatinine | 35 | 229.60 | 178.40 | 295.48 | † | 16 | 197.92 | 127.89 | 306.30 | † | 1655 | 63.97 | 60.32 | 67.85 |  |
| 2-FLU | ng/g creatinine | 35 | 436.86 | 347.28 | 549.55 | † | 16 | 426.19 | 298.61 | 608.26 | † | 1655 | 167.20 | 158.05 | 176.88 |  |
| 1-NAP | ug/g creatinine | 35 | 2.28 | 1.57 | 3.31 | † | 16 | 3.13 | 2.01 | 4.87 | † | 1649 | 1.40 | 1.28 | 1.53 |  |
| 2-NAP | ug/g creatinine | 35 | 5.11 | 3.91 | 6.67 | † | 16 | 6.32 | 4.83 | 8.29 | † | 1652 | 4.63 | 4.34 | 4.94 |  |
| 1-PHE | ng/g creatinine | 35 | 125.93 | 102.21 | 155.17 | † | 16 | 104.29 | 78.72 | 138.17 | † | 1655 | 106.27 | 101.08 | 111.72 |  |
| 2,3-PHE | ng/g creatinine | 35 | 232.71 | 188.77 | 286.89 | † | 16 | 173.47 | 128.89 | 233.45 | † | 1655 | 129.09 | 123.14 | 135.33 |  |

† Estimate should be interpreted with caution because it has low precision. It is based on a sample size of less than 50, or the coefficient of variation of the estimate is larger than 30 percent (i.e. RSE > 30% or n <50).

Table S5. Urinary BOEs of VOCs in PATH Study Wave 1

|  |  | **Exclusive Current Est. Cig Users Daily** | | | | | **Exclusive Current Est. Cig Users Nondaily** | | | | | **Exclusive Current Est. SLT Users Daily** | | | | |
| --- | --- | --- | --- | --- | --- | --- | --- | --- | --- | --- | --- | --- | --- | --- | --- | --- |
| Analyte | Unit | N | Geometric Mean | Lower Bound of 95% CI | Upper Bound of 95% CI | flag | N | Geometric Mean | Lower Bound of 95% CI | Upper Bound of 95% CI | flag | N | Geometric Mean | Lower Bound of 95% CI | Upper Bound of 95% CI | flag |
| 2MHA | ng/g creatinine | 1950 | 120012.66 | 113057.92 | 127395.22 |  | 429 | 38502.21 | 33821.78 | 43830.35 |  | 339 | 34073.23 | 29293.49 | 39632.86 |  |
| 34MH | ng/g creatinine | 1988 | 801413.65 | 757852.03 | 847479.21 |  | 437 | 260461.72 | 232546.39 | 291728.05 |  | 349 | 188053.52 | 164608.05 | 214838.37 |  |
| AAMA | ng/g creatinine | 1974 | 149828.00 | 143873.10 | 156029.36 |  | 434 | 71382.84 | 61633.48 | 82674.38 |  | 346 | 47720.21 | 44388.95 | 51301.47 |  |
| AMCA | ng/g creatinine | 1960 | 565534.61 | 538033.23 | 594441.71 |  | 433 | 193679.75 | 172770.76 | 217119.19 |  | 348 | 131970.61 | 123291.98 | 141260.14 |  |
| BMA | ng/g creatinine | 1980 | 6528.16 | 6076.45 | 7013.46 |  | 434 | 6325.53 | 5309.83 | 7535.52 |  | 345 | 5453.29 | 5074.68 | 5860.14 |  |
| CEMA | ng/g creatinine | 1869 | 309766.77 | 292804.42 | 327711.76 |  | 410 | 127686.85 | 111543.32 | 146166.81 |  | 333 | 95586.26 | 87689.90 | 104193.68 |  |
| CYHA | ng/g creatinine | 1989 | 28896.44 | 27074.77 | 30840.67 |  | 437 | 4558.12 | 3696.11 | 5621.16 | ‡ (50.1%) | 349 | 1960.34 | 1779.31 | 2159.80 | ‡ (94.8%) |
| CYMA | ng/g creatinine | 1989 | 176057.44 | 164689.84 | 188209.67 |  | 437 | 17454.75 | 13078.48 | 23295.39 |  | 349 | 1758.15 | 1546.84 | 1998.32 |  |
| DHBM | ng/g creatinine | 1772 | 523427.78 | 507651.96 | 539693.86 |  | 399 | 368245.42 | 344100.94 | 394084.06 |  | 319 | 360658.46 | 344411.27 | 377672.10 |  |
| GAMA | ng/g creatinine | 1869 | 18777.71 | 18096.62 | 19484.43 |  | 409 | 10447.26 | 9314.25 | 11718.09 | ‡ (41.2%) | 331 | 8693.44 | 8055.40 | 9382.03 | ‡ (57.9%) |
| HEMA | ng/g creatinine | 1717 | 3213.39 | 3001.22 | 3440.56 |  | 375 | 1233.91 | 1015.68 | 1499.04 |  | 318 | 875.13 | 798.72 | 958.85 | ‡ (48.7%) |
| HPM2 | ng/g creatinine | 1973 | 79841.45 | 75993.16 | 83884.61 |  | 433 | 36485.79 | 32316.89 | 41192.48 |  | 348 | 27866.75 | 25107.20 | 30929.61 |  |
| HPMA | ng/g creatinine | 1962 | 1387615.97 | 1300690.84 | 1480350.30 |  | 427 | 402487.78 | 345139.24 | 469365.40 |  | 342 | 250137.95 | 230630.03 | 271295.95 |  |
| HPMM | ng/g creatinine | 1989 | 2904648.33 | 2726442.18 | 3094502.41 |  | 437 | 719961.13 | 644948.02 | 803698.92 |  | 349 | 438283.52 | 407286.86 | 471639.18 |  |
| IPM3 | ng/g creatinine | 1987 | 45027.80 | 42059.07 | 48206.07 |  | 434 | 7341.99 | 6182.16 | 8719.41 |  | 344 | 3382.84 | 3062.88 | 3736.24 |  |
| MADA | ng/g creatinine | 1818 | 304670.92 | 293948.24 | 315784.75 |  | 398 | 173048.55 | 161773.22 | 185109.75 |  | 316 | 139993.69 | 128478.95 | 152540.44 |  |
| MHB3 | ng/g creatinine | 1989 | 34453.69 | 32599.19 | 36413.68 |  | 437 | 8871.14 | 7465.53 | 10541.40 |  | 348 | 4355.02 | 4014.23 | 4724.74 |  |
| PHGA | ng/g creatinine | 1881 | 404224.82 | 388639.52 | 420435.11 |  | 416 | 244724.14 | 223848.78 | 267546.27 |  | 337 | 222231.57 | 207893.16 | 237558.90 |  |
| PMA | ng/g creatinine | 1989 | 1096.50 | 1034.84 | 1161.84 |  | 437 | 911.10 | 815.88 | 1017.43 |  | 349 | 964.72 | 871.75 | 1067.59 |  |
| TTCA | ng/g creatinine | 1737 | 21928.14 | 20481.43 | 23477.03 |  | 381 | 19864.08 | 17270.31 | 22847.41 |  | 304 | 18141.95 | 15747.07 | 20901.07 |  |
|  |  | **Exclusive Current Est. SLT Users Nondaily** | | | | | **Daily CIG+Daily SLT** | | | | | **Daily CIG+Nondaily SLT** | | | | |
| Analyte | Unit | N | Geometric Mean | Lower Bound of 95% CI | Upper Bound of 95% CI | flag | N | Geometric Mean | Lower Bound of 95% CI | Upper Bound of 95% CI | flag | N | Geometric Mean | Lower Bound of 95% CI | Upper Bound of 95% CI | flag |
| 2MHA | ng/g creatinine | 94 | 27834.28 | 20125.97 | 38494.89 |  | 32 | 101423.23 | 71993.60 | 142883.15 | † | 56 | 121635.20 | 96137.07 | 153896.13 |  |
| 34MH | ng/g creatinine | 97 | 171591.25 | 131076.20 | 224629.32 |  | 32 | 568121.15 | 383409.88 | 841818.79 | † | 56 | 830523.52 | 684555.95 | 1007615.70 |  |
| AAMA | ng/g creatinine | 96 | 41986.32 | 36359.62 | 48483.75 |  | 31 | 126860.33 | 87472.13 | 183984.82 | † | 56 | 126110.17 | 105589.72 | 150618.59 |  |
| AMCA | ng/g creatinine | 97 | 127384.54 | 109780.13 | 147812.01 |  | 32 | 414615.90 | 286845.44 | 599299.54 | † | 56 | 496887.12 | 431709.54 | 571904.92 |  |
| BMA | ng/g creatinine | 97 | 6019.86 | 4823.99 | 7512.18 |  | 31 | 4551.71 | 3326.90 | 6227.44 | † | 54 | 5432.67 | 4070.25 | 7251.13 |  |
| CEMA | ng/g creatinine | 91 | 92120.70 | 78223.81 | 108486.46 |  | 30 | 266442.44 | 174525.17 | 406769.82 | † | 54 | 238527.00 | 199774.09 | 284797.34 |  |
| CYHA | ng/g creatinine | 97 | 2195.85 | 1815.15 | 2656.39 | ‡ (94.8%) | 32 | 18535.56 | 10571.87 | 32498.22 | † | 56 | 30386.85 | 24618.68 | 37506.51 |  |
| CYMA | ng/g creatinine | 97 | 1481.70 | 1165.03 | 1884.43 |  | 32 | 99735.06 | 45011.62 | 220989.17 | † | 56 | 153780.10 | 121574.18 | 194517.60 |  |
| DHBM | ng/g creatinine | 86 | 324281.99 | 292069.70 | 360046.97 |  | 29 | 494465.78 | 380721.27 | 642192.67 | † | 49 | 398479.59 | 320196.00 | 495902.46 | † |
| GAMA | ng/g creatinine | 89 | 9010.87 | 7630.80 | 10640.54 | ‡ (67.0%) | 32 | 15991.63 | 12361.05 | 20688.55 | †, ‡ (46.9%) | 51 | 16865.14 | 14166.26 | 20078.20 |  |
| HEMA | ng/g creatinine | 83 | 857.33 | 711.32 | 1033.32 | ‡ (56.7%) | 29 | 2214.19 | 1606.93 | 3050.94 | † | 49 | 2588.95 | 2077.66 | 3226.07 | † |
| HPM2 | ng/g creatinine | 95 | 35672.59 | 26935.17 | 47244.31 |  | 31 | 65762.43 | 47779.84 | 90513.01 | † | 56 | 75455.31 | 62386.26 | 91262.16 |  |
| HPMA | ng/g creatinine | 97 | 267514.85 | 229408.17 | 311951.38 |  | 32 | 1031151.28 | 620326.41 | 1714054.01 | † | 53 | 1211544.10 | 988622.70 | 1484731.34 |  |
| HPMM | ng/g creatinine | 97 | 424346.58 | 368194.56 | 489062.13 |  | 32 | 1982942.11 | 1147802.22 | 3425729.05 | † | 56 | 2482233.71 | 1973291.62 | 3122439.75 |  |
| IPM3 | ng/g creatinine | 97 | 3397.02 | 2838.40 | 4065.57 |  | 30 | 31980.41 | 18026.68 | 56735.16 | † | 56 | 41994.43 | 34176.47 | 51600.77 |  |
| MADA | ng/g creatinine | 91 | 147051.78 | 119154.76 | 181480.16 |  | 29 | 294425.40 | 209935.36 | 412919.09 | † | 50 | 262071.97 | 227192.94 | 302305.68 |  |
| MHB3 | ng/g creatinine | 97 | 3988.51 | 3400.32 | 4678.44 |  | 32 | 24963.88 | 16200.98 | 38466.51 | † | 56 | 29718.70 | 24777.80 | 35644.86 |  |
| PHGA | ng/g creatinine | 94 | 217127.87 | 177993.40 | 264866.63 |  | 32 | 384216.70 | 286710.46 | 514883.44 | † | 52 | 357527.77 | 298317.16 | 428490.63 |  |
| PMA | ng/g creatinine | 97 | 981.94 | 820.19 | 1175.59 |  | 32 | 1299.47 | 900.85 | 1874.49 | † | 56 | 946.61 | 758.84 | 1180.83 |  |
| TTCA | ng/g creatinine | 82 | 22914.58 | 17905.67 | 29324.68 |  | 28 | 26708.52 | 17639.52 | 40440.17 | † | 54 | 14813.57 | 11336.86 | 19356.49 |  |
|  |  | **Nondaily CIG+Daily SLT** | | | | | **Nondaily CIG+ Nondaily SLT** | | | | | **Never Tobacco Users** | | | | |
| Analyte | Unit | N | Geometric Mean | Lower Bound of 95% CI | Upper Bound of 95% CI | flag | N | Geometric Mean | Lower Bound of 95% CI | Upper Bound of 95% CI | flag | N | Geometric Mean | Lower Bound of 95% CI | Upper Bound of 95% CI | flag |
| 2MHA | ng/g creatinine | 35 | 40283.96 | 28725.98 | 56492.33 | † | 15 | 48446.96 | 27786.72 | 84468.70 | † | 1589 | 22258.40 | 20620.95 | 24025.88 |  |
| 34MH | ng/g creatinine | 35 | 259838.86 | 191259.74 | 353008.08 | † | 16 | 301497.99 | 167843.12 | 541583.34 | † | 1651 | 152328.24 | 143741.51 | 161427.92 |  |
| AAMA | ng/g creatinine | 35 | 62172.22 | 48842.99 | 79138.98 | † | 16 | 81238.75 | 59825.29 | 110316.80 | † | 1645 | 45301.98 | 43124.87 | 47589.00 |  |
| AMCA | ng/g creatinine | 34 | 165600.24 | 128999.66 | 212585.36 | † | 16 | 171955.74 | 135674.53 | 217939.02 | † | 1653 | 104256.20 | 98326.35 | 110543.66 |  |
| BMA | ng/g creatinine | 35 | 6673.19 | 5068.19 | 8786.47 | † | 16 | 4734.35 | 3448.68 | 6499.33 | † | 1653 | 6124.62 | 5781.64 | 6487.95 |  |
| CEMA | ng/g creatinine | 32 | 108242.07 | 94641.84 | 123796.69 | † | 16 | 116133.84 | 86403.35 | 156094.27 | † | 1599 | 93948.50 | 89656.31 | 98446.18 |  |
| CYHA | ng/g creatinine | 35 | 3734.49 | 2392.43 | 5829.41 | †, ‡ (51.4%) | 16 | 6665.26 | 3831.11 | 11596.03 | † | 1653 | 1817.60 | 1710.12 | 1931.83 | ‡ (95.7%) |
| CYMA | ng/g creatinine | 35 | 14073.39 | 8126.11 | 24373.32 | † | 16 | 33273.37 | 17242.17 | 64209.85 | † | 1653 | 1271.47 | 1192.49 | 1355.68 |  |
| DHBM | ng/g creatinine | 34 | 380609.32 | 322146.68 | 449681.67 | † | 14 | 400229.15 | 298266.60 | 537047.63 | † | 1481 | 347474.47 | 335686.77 | 359676.10 |  |
| GAMA | ng/g creatinine | 31 | 10193.70 | 7582.70 | 13703.78 | † | 16 | 9804.76 | 6954.75 | 13822.70 | † | 1581 | 8581.73 | 8098.27 | 9094.05 | ‡ (54.9%) |
| HEMA | ng/g creatinine | 31 | 954.92 | 665.41 | 1370.38 | † | 11 | 1251.75 | 667.62 | 2346.96 | † | 1508 | 961.54 | 891.29 | 1037.32 | ‡ (41.0%) |
| HPM2 | ng/g creatinine | 35 | 32979.28 | 26009.42 | 41816.88 | † | 16 | 43022.79 | 29818.38 | 62074.47 | † | 1605 | 32196.18 | 29213.08 | 35483.90 |  |
| HPMA | ng/g creatinine | 34 | 289010.80 | 228866.55 | 364960.47 | † | 16 | 383937.27 | 286609.45 | 514316.01 | † | 1653 | 261728.18 | 247178.69 | 277134.09 |  |
| HPMM | ng/g creatinine | 35 | 673603.35 | 524541.78 | 865024.47 | † | 16 | 770704.68 | 539126.02 | 1101756.70 | † | 1653 | 440946.09 | 416420.01 | 466916.69 |  |
| IPM3 | ng/g creatinine | 35 | 6736.92 | 4732.92 | 9589.44 | † | 16 | 10411.11 | 5183.71 | 20909.98 | † | 1637 | 3245.50 | 3043.03 | 3461.44 |  |
| MADA | ng/g creatinine | 33 | 169256.76 | 133566.51 | 214483.78 | † | 16 | 147713.74 | 109032.81 | 200117.27 | † | 1464 | 128056.60 | 122435.02 | 133936.29 |  |
| MHB3 | ng/g creatinine | 35 | 6880.81 | 5219.17 | 9071.47 | † | 16 | 10335.11 | 6752.80 | 15817.80 | † | 1653 | 4438.25 | 4241.12 | 4644.55 |  |
| PHGA | ng/g creatinine | 33 | 252338.61 | 205832.06 | 309353.04 | † | 16 | 229181.73 | 170223.22 | 308561.11 | † | 1550 | 202536.88 | 194481.51 | 210925.91 |  |
| PMA | ng/g creatinine | 35 | 908.48 | 690.72 | 1194.90 | † | 16 | 1198.84 | 757.23 | 1898.00 | † | 1653 | 1006.77 | 935.64 | 1083.30 |  |
| TTCA | ng/g creatinine | 33 | 20104.20 | 13615.55 | 29685.09 | † | 13 | 12440.64 | 9777.08 | 15829.84 | † | 1369 | 20661.03 | 18340.40 | 23275.30 |  |

† Estimate should be interpreted with caution because it has low precision. It is based on a sample size of less than 50, or the coefficient of variation of the estimate is larger than 30 percent. (i.e. RSE > 30% or n <50)

‡ Estimates were flagged due to more than 40% of the samples below LOD in the tobacco user group. The percentage of samples below LOD are in quotes.

Table S6. Urinary BOEs of Metals in PATH Study Wave 1

|  |  | **Exclusive Current Est. Cig Users Daily** | | | | | **Exclusive Current Est. Cig Users Nondaily** | | | | | **Exclusive Current Est. SLT Users Daily** | | | | |
| --- | --- | --- | --- | --- | --- | --- | --- | --- | --- | --- | --- | --- | --- | --- | --- | --- |
| Analyte | Unit | N | Geometric Mean | Lower Bound of 95% CI | Upper Bound of 95% CI | flag | N | Geometric Mean | Lower Bound of 95% CI | Upper Bound of 95% CI | flag | N | Geometric Mean | Lower Bound of 95% CI | Upper Bound of 95% CI | flag |
| Cadmium | ug/g creatinine | 1982 | 0.311 | 0.291 | 0.331 |  | 437 | 0.146 | 0.124 | 0.172 |  | 351 | 0.134 | 0.122 | 0.147 |  |
| Lead | ug/g creatinine | 1982 | 0.494 | 0.474 | 0.516 |  | 437 | 0.378 | 0.333 | 0.430 |  | 351 | 0.412 | 0.375 | 0.452 |  |
| Beryllium | ug/g creatinine | 1982 | 0.012 | 0.011 | 0.013 | ‡ (93.9%) | 437 | 0.011 | 0.010 | 0.012 | ‡ (93.1%) | 351 | 0.011 | 0.010 | 0.012 | ‡ (92.0%) |
| Cobalt | ug/g creatinine | 1982 | 0.545 | 0.526 | 0.564 |  | 437 | 0.501 | 0.452 | 0.555 |  | 351 | 0.457 | 0.430 | 0.485 |  |
| Manganese | ug/g creatinine | 1981 | 0.139 | 0.132 | 0.147 | ‡ (56.0%) | 437 | 0.114 | 0.101 | 0.130 | ‡ (60.0%) | 350 | 0.128 | 0.116 | 0.142 | ‡ (57.0%) |
| Strontium | ug/g creatinine | 1980 | 113.354 | 106.811 | 120.297 |  | 436 | 111.097 | 99.279 | 124.321 |  | 351 | 115.031 | 104.595 | 126.508 |  |
| Thallium | ug/g creatinine | 1982 | 0.153 | 0.147 | 0.158 |  | 437 | 0.162 | 0.152 | 0.173 |  | 351 | 0.140 | 0.131 | 0.150 |  |
| Uranium | ug/g creatinine | 1982 | 0.007 | 0.007 | 0.008 |  | 437 | 0.006 | 0.004 | 0.007 |  | 351 | 0.005 | 0.005 | 0.006 |  |
|  |  | **Exclusive Current Est. SLT Users Nondaily** | | | | | **Daily CIG+Daily SLT** | | | | | **Daily CIG+Nondaily SLT** | | | | |
| Analyte | Unit | N | Geometric Mean | Lower Bound of 95% CI | Upper Bound of 95% CI | flag | N | Geometric Mean | Lower Bound of 95% CI | Upper Bound of 95% CI | flag | N | Geometric Mean | Lower Bound of 95% CI | Upper Bound of 95% CI | flag |
| Cadmium | ug/g creatinine | 97 | 0.098 | 0.084 | 0.114 |  | 33 | 0.226 | 0.153 | 0.333 | † | 56 | 0.161 | 0.121 | 0.216 |  |
| Lead | ug/g creatinine | 97 | 0.364 | 0.311 | 0.427 |  | 33 | 0.485 | 0.386 | 0.610 | † | 56 | 0.443 | 0.383 | 0.512 |  |
| Beryllium | ug/g creatinine | 97 | 0.013 | 0.010 | 0.015 | ‡ (93.8%) | 33 | 0.015 | 0.011 | 0.022 | †, ‡ (87.9%) | 56 | 0.010 | 0.009 | 0.012 | ‡ (96.4%) |
| Cobalt | ug/g creatinine | 97 | 0.417 | 0.356 | 0.488 |  | 33 | 0.492 | 0.419 | 0.576 | † | 55 | 0.461 | 0.403 | 0.527 |  |
| Manganese | ug/g creatinine | 97 | 0.146 | 0.113 | 0.189 | ‡ (63.9%) | 33 | 0.152 | 0.127 | 0.183 | †. ‡ (69.7%) | 56 | 0.124 | 0.105 | 0.146 | ‡ (55.4%) |
| Strontium | ug/g creatinine | 97 | 103.854 | 89.147 | 120.988 |  | 33 | 123.534 | 95.486 | 159.820 | † | 56 | 118.800 | 96.123 | 146.827 |  |
| Thallium | ug/g creatinine | 97 | 0.137 | 0.123 | 0.151 |  | 33 | 0.138 | 0.113 | 0.168 | † | 56 | 0.124 | 0.108 | 0.141 |  |
| Uranium | ug/g creatinine | 97 | 0.007 | 0.005 | 0.009 |  | 33 | 0.006 | 0.005 | 0.007 | † | 56 | 0.008 | 0.006 | 0.010 |  |
|  |  | **Nondaily CIG+Daily SLT** | | | | | **Nondaily CIG+ Nondaily SLT** | | | | | **Never Tobacco Users** | | | | |
| Analyte | Unit | N | Geometric Mean | Lower Bound of 95% CI | Upper Bound of 95% CI | flag | N | Geometric Mean | Lower Bound of 95% CI | Upper Bound of 95% CI | flag | N | Geometric Mean | Lower Bound of 95% CI | Upper Bound of 95% CI | flag |
| Cadmium | ug/g creatinine | 35 | 0.093 | 0.063 | 0.137 | † | 16 | 0.061 | 0.042 | 0.087 | † | 1652 | 0.149 | 0.140 | 0.159 |  |
| Lead | ug/g creatinine | 35 | 0.326 | 0.266 | 0.398 | † | 16 | 0.346 | 0.244 | 0.492 | † | 1653 | 0.351 | 0.330 | 0.373 |  |
| Beryllium | ug/g creatinine | 35 | 0.009 | 0.007 | 0.012 | †, ‡ (91.4%) | 16 | 0.009 | 0.007 | 0.011 | †, ‡ (93.8%) | 1653 | 0.011 | 0.010 | 0.011 | ‡ (96.5%) |
| Cobalt | ug/g creatinine | 35 | 0.426 | 0.369 | 0.491 | † | 16 | 0.383 | 0.315 | 0.467 | † | 1653 | 0.564 | 0.537 | 0.591 |  |
| Manganese | ug/g creatinine | 35 | 0.096 | 0.072 | 0.129 | †, ‡ (60%) | 15 | 0.108 | 0.080 | 0.147 | †, ‡ (43.8%) | 1652 | 0.131 | 0.124 | 0.138 | ‡ (49.5%) |
| Strontium | ug/g creatinine | 35 | 133.363 | 106.922 | 166.342 | † | 16 | 93.445 | 69.070 | 126.423 | † | 1653 | 112.710 | 106.776 | 118.973 |  |
| Thallium | ug/g creatinine | 35 | 0.148 | 0.127 | 0.171 | † | 16 | 0.172 | 0.151 | 0.196 | † | 1652 | 0.172 | 0.164 | 0.180 |  |
| Uranium | ug/g creatinine | 35 | 0.007 | 0.005 | 0.009 | † | 16 | 0.008 | 0.004 | 0.017 | † | 1653 | 0.005 | 0.005 | 0.006 |  |

† Estimate should be interpreted with caution because it has low precision. It is based on a sample size of less than 50, or the coefficient of variation of the estimate is larger than 30 percent. (i.e. RSE > 30% or n <50)

‡ Estimates were flagged due to more than 40% of the samples below LOD in the tobacco user group. The percentage of samples below LOD are in quotes.

Table S7. Urinary BOEs of Arsenic in PATH Study Wave 1

|  |  | **Exclusive Current Est. Cig Users Daily** | | | | | **Exclusive Current Est. Cig Users Nondaily** | | | | | **Exclusive Current Est. SLT Users Daily** | | | | |
| --- | --- | --- | --- | --- | --- | --- | --- | --- | --- | --- | --- | --- | --- | --- | --- | --- |
| Analyte | Unit | N | Geometric Mean | Lower Bound of 95% CI | Upper Bound of 95% CI | flag | N | Geometric Mean | Lower Bound of 95% CI | Upper Bound of 95% CI | flag | N | Geometric Mean | Lower Bound of 95% CI | Upper Bound of 95% CI | flag |
| Arsenite | ug/g creatinine | 1988 | 0.330 | 0.305 | 0.356 |  | 437 | 0.352 | 0.293 | 0.423 |  | 351 | 0.343 | 0.304 | 0.387 |  |
| Arsenate | ug/g creatinine | 1988 | 0.605 | 0.574 | 0.636 | ‡ (95.9%) | 437 | 0.528 | 0.481 | 0.581 | ‡ (94.1%) | 351 | 0.595 | 0.542 | 0.654 | ‡ (90.3%) |
| Dimethylarsinic acid | ug/g creatinine | 1988 | 3.022 | 2.898 | 3.152 |  | 437 | 3.513 | 3.196 | 3.861 |  | 351 | 2.806 | 2.597 | 3.032 |  |
| Monomethylarsonic acid | ug/g creatinine | 1988 | 0.422 | 0.399 | 0.448 |  | 437 | 0.407 | 0.362 | 0.457 |  | 351 | 0.427 | 0.383 | 0.475 |  |
| Total arsenic | ug/g creatinine | 1988 | 4.658 | 4.471 | 4.853 |  | 437 | 5.122 | 4.705 | 5.577 |  | 351 | 4.463 | 4.154 | 4.795 |  |
|  |  | **Exclusive Current Est. SLT Users Nondaily** | | | | | **Daily CIG+Daily SLT** | | | | | **Daily CIG+Nondaily SLT** | | | | |
| Analyte | Unit | N | Geometric Mean | Lower Bound of 95% CI | Upper Bound of 95% CI | flag | N | Geometric Mean | Lower Bound of 95% CI | Upper Bound of 95% CI | flag | N | Geometric Mean | Lower Bound of 95% CI | Upper Bound of 95% CI | flag |
| Arsenite | ug/g creatinine | 97 | 0.411 | 0.331 | 0.509 |  | 33 | 0.472 | 0.342 | 0.650 | † | 56 | 0.404 | 0.317 | 0.516 |  |
| Arsenate | ug/g creatinine | 97 | 0.675 | 0.570 | 0.800 | ‡ (89.7%) | 33 | 0.736 | 0.529 | 1.024 | †, ‡ (93.9%) | 56 | 0.543 | 0.468 | 0.630 | ‡ (89.3%) |
| Dimethylarsinic acid | ug/g creatinine | 97 | 3.062 | 2.660 | 3.524 |  | 33 | 3.027 | 2.177 | 4.209 | †, ‡ (42.4%) | 56 | 2.673 | 2.327 | 3.071 |  |
| Monomethylarsonic acid | ug/g creatinine | 97 | 0.416 | 0.347 | 0.499 |  | 33 | 0.427 | 0.311 | 0.587 | †, ‡ (42.4%) | 56 | 0.430 | 0.363 | 0.509 |  |
| Total arsenic | ug/g creatinine | 97 | 4.874 | 4.271 | 5.562 |  | 33 | 4.939 | 3.666 | 6.654 | † | 56 | 4.313 | 3.868 | 4.810 |  |
|  |  | **Nondaily CIG+Daily SLT** | | | | | **Nondaily CIG+ Nondaily SLT** | | | | | **Never Tobacco Users** | | | | |
| Analyte | Unit | N | Geometric Mean | Lower Bound of 95% CI | Upper Bound of 95% CI | flag | N | Geometric Mean | Lower Bound of 95% CI | Upper Bound of 95% CI | flag | N | Geometric Mean | Lower Bound of 95% CI | Upper Bound of 95% CI | flag |
| Arsenite | ug/g creatinine | 35 | 0.413 | 0.317 | 0.537 | † | 16 | 0.349 | 0.249 | 0.490 | † | 1653 | 0.332 | 0.307 | 0.359 |  |
| Arsenate | ug/g creatinine | 35 | 0.462 | 0.349 | 0.612 | †, ‡ (85.7%) | 16 | 0.428 | 0.337 | 0.543 | †, ‡ (100%) | 1653 | 0.535 | 0.505 | 0.565 | ‡ (96.2%) |
| Dimethylarsinic acid | ug/g creatinine | 35 | 3.183 | 2.463 | 4.114 | † | 16 | 2.460 | 1.776 | 3.407 | † | 1653 | 3.691 | 3.478 | 3.916 |  |
| Monomethylarsonic acid | ug/g creatinine | 35 | 0.483 | 0.388 | 0.602 | † | 16 | 0.504 | 0.338 | 0.753 | † | 1653 | 0.482 | 0.448 | 0.518 |  |
| Total arsenic | ug/g creatinine | 35 | 4.768 | 3.765 | 6.039 | † | 16 | 3.962 | 3.008 | 5.220 | † | 1653 | 5.360 | 5.078 | 5.658 |  |

† Estimate should be interpreted with caution because it has low precision. It is based on a sample size of less than 50, or the coefficient of variation of the estimate is larger than 30 percent. (i.e. RSE > 30% or n <50)

‡ Estimates were flagged due to more than 40% of the samples below LOD in the tobacco user group. The percentage of samples below LOD are in quotes.

References:

1. Wei B, Feng J, Rehmani IJ, Miller S, McGuffey JE, Blount BC*, et al.* A high-throughput robotic sample preparation system and HPLC-MS/MS for measuring urinary anatabine, anabasine, nicotine and major nicotine metabolites. Clinica Chimica Acta **2014**;436:290-7 doi <https://doi.org/10.1016/j.cca.2014.06.012>.

2. Bernert JT, Harmon TL, Sosnoff CS, McGuffey JE. Use of continine immunoassay test strips for preclassifying urine samples from smokers and nonsmokers prior to analysis by LC-MS-MS. J Anal Toxicol **2005**;29(8):814-8.

3. Xia B, Xia Y, Wong J, Nicodemus KJ, Xu M, Lee J*, et al.* Quantitative analysis of five tobacco-specific N-nitrosamines in urine by liquid chromatography-atmospheric pressure ionization tandem mass spectrometry. Biomed Chromatogr **2014**;28(3):375-84 doi 10.1002/bmc.3031.

4. Wang Y, Meng L, Pittman EN, Etheredge A, Hubbard K, Trinidad DA*, et al.* Quantification of urinary mono-hydroxylated metabolites of polycyclic aromatic hydrocarbons by on-line solid phase extraction-high performance liquid chromatography-tandem mass spectrometry. Anal Bioanal Chem **2017**;409(4):931-7 doi 10.1007/s00216-016-9933-x.

5. Alwis KU, Bailey TL, Patel D, Wang L, Blount BC. Measuring urinary N-acetyl-S-(4-hydroxy-2-methyl-2-buten-1-yl)-L-cysteine (IPMA3) as a potential biomarker of isoprene exposure. Anal Chim Acta **2016**;941:61-6 doi 10.1016/j.aca.2016.08.023.

6. Alwis KU, Blount BC, Britt AS, Patel D, Ashley DL. Simultaneous analysis of 28 urinary VOC metabolites using ultra high performance liquid chromatography coupled with electrospray ionization tandem mass spectrometry (UPLC-ESI/MSMS). Anal Chim Acta **2012**;750:152-60 doi 10.1016/j.aca.2012.04.009.

7. Caldwell K, Hartel J, Jarrett J, Jones R. Inductively coupled plasma mass spectrometry to measure multiple toxic elements in urine in NHANES 1999-2000. 2005. 1-7 p.

8. Jarrett JM, Xiao G, Caldwell KL, Henahan D, Shakirova G, Jones RL. Eliminating molybdenum oxide interference in urine cadmium biomonitoring using ICP-DRC-MS. Journal of Analytical Atomic Spectrometry **2008**;23(7):962-7 doi 10.1039/B801927D.

9. Caldwell KL, Jones RL, Verdon CP, Jarrett JM, Caudill SP, Osterloh JD. Levels of urinary total and speciated arsenic in the US population: National Health and Nutrition Examination Survey 2003-2004. J Expo Sci Environ Epidemiol **2009**;19(1):59-68 doi 10.1038/jes.2008.32.

10. Verdon CP, Caldwell KL, Fresquez MR, Jones RL. Determination of seven arsenic compounds in urine by HPLC-ICP-DRC-MS: a CDC population biomonitoring method. Anal Bioanal Chem **2009**;393(3):939-47 doi 10.1007/s00216-008-2537-3.
